# Supplementary material
Source: PubMed Central journal article supplement (PMC5826895)

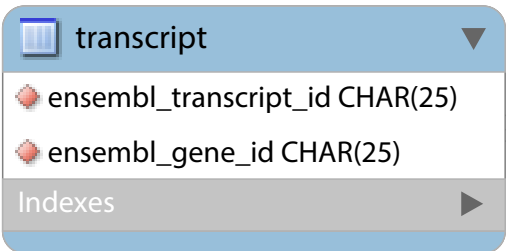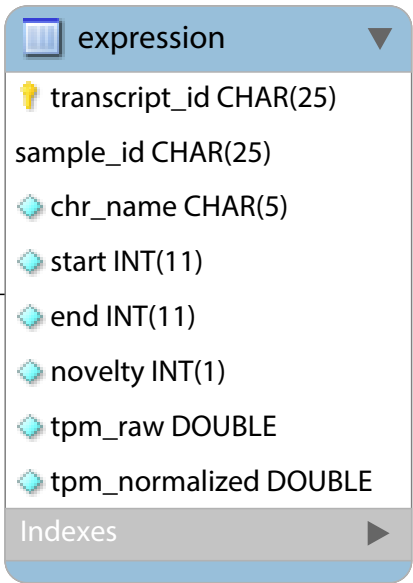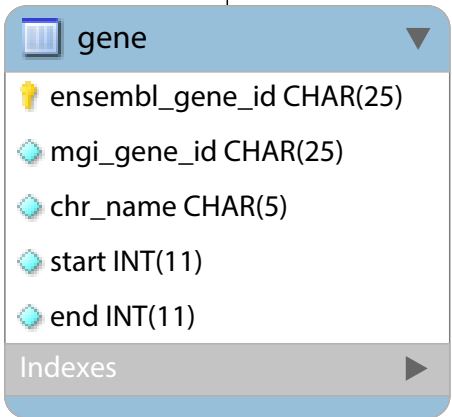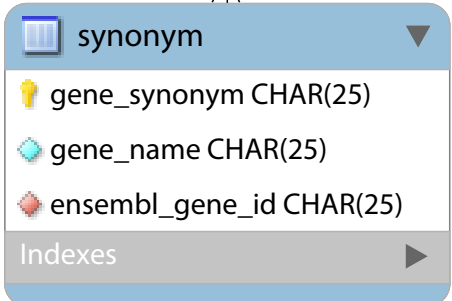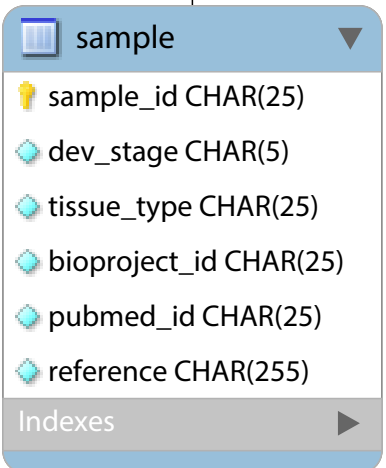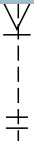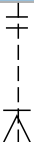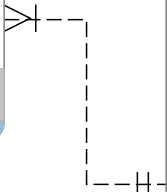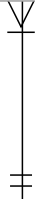

Supplement: NIHMS935584-supplement-1.pdf [file NIHMS935584-supplement-1.pdf]

A

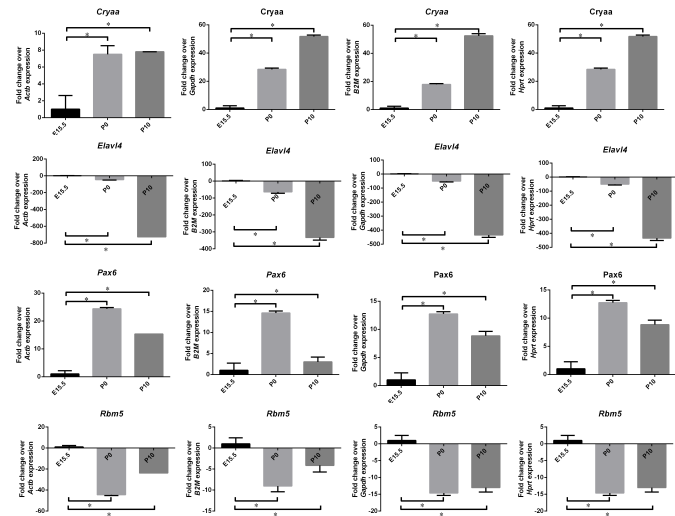

B

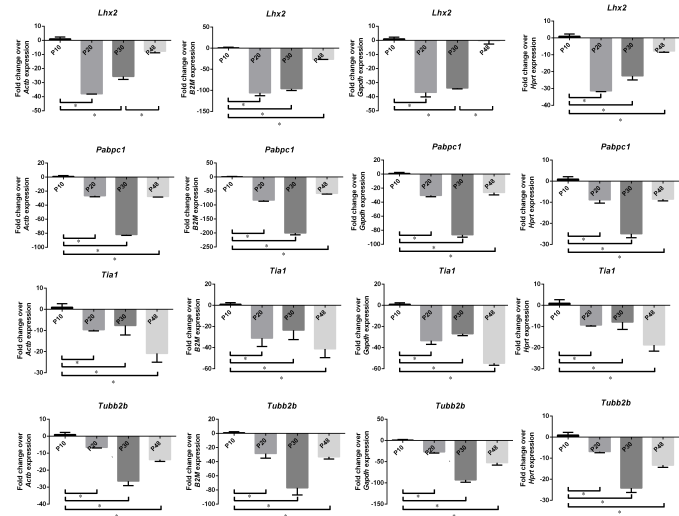

C

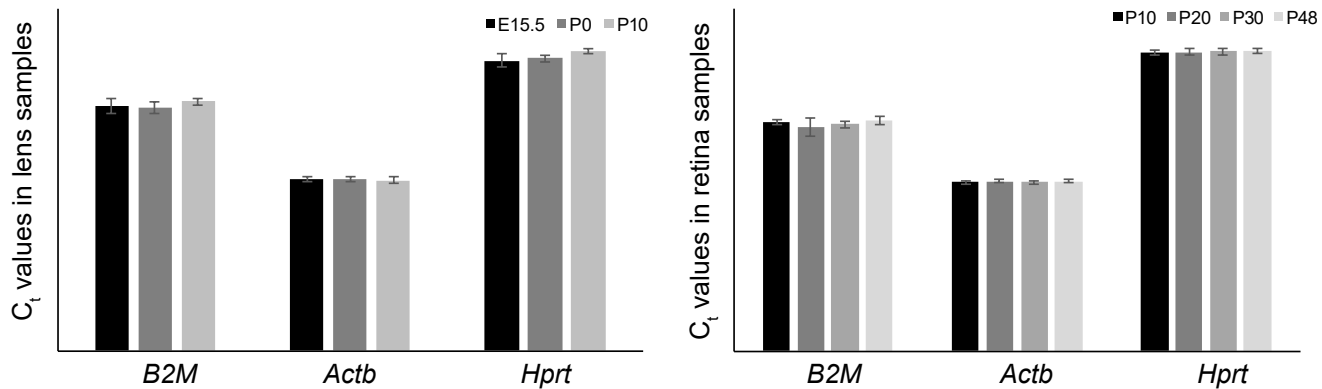

Supplement: NIHMS935584-supplement-3.pdf [file NIHMS935584-supplement-3.pdf]
